# Supplementary material for: A primary–secondary triboelectric nanogenerator with charge excitation shift in a wind-driven alternating operating mode
Source: Royal Society of Chemistry journal article supplement (doi:10.1039/d3se00394a), 2023-01-01
Supplement: d3se00394a5.pdf [file d3se00394a5.pdf]

# 1 Supporting Information

## 2 A primary-secondary triboelectric nanogenerator

### 3 with charge excitation shift in a wind-driven

#### 4 alternating operating mode

5 Zhibo Xu <sup>a, b</sup>, Jianwei Ge <sup>b</sup>, Qianwang Wang <sup>b</sup>, Xin Yu <sup>b</sup>, Yili Hu <sup>c</sup>, Jianming Wen  
6 <sup>c, \*</sup>, Wei Han <sup>a, \*</sup>, Tinghai Cheng <sup>b, \*</sup>

7 <sup>a</sup> College of Physics, Jilin University, Changchun 130012, China

8 <sup>b</sup> Beijing Institute of Nanoenergy and Nanosystems, Chinese Academy of Sciences, Beijing 101400, China

9 <sup>c</sup> The Institute of Precision Machinery and Smart Structure, Key Laboratory of Intelligent Operation and Maintenance

10 Technology & Equipment for Urban Rail Transit of Zhejiang Province, College of Engineering, Zhejiang Normal University,  
11 Yingbin Street 688, Jinhua 321004, China

12 \* Corresponding authors' e-mail addresses: wjming@zjnu.cn, whan@jlu.edu.cn, chengtinghai@binn.cas.cn

#### 13 Note1: Calculation process of $V_2$ .

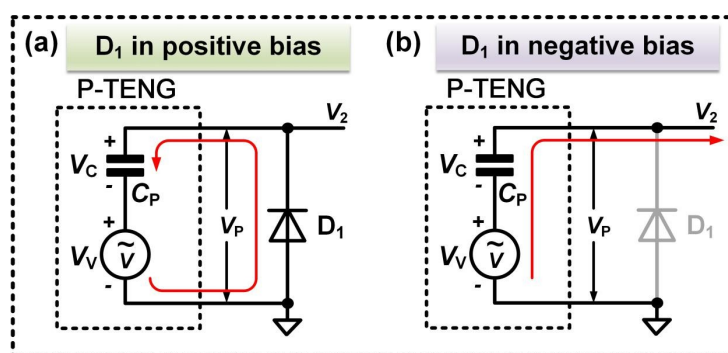

14  
15 **Fig. S1.** Working process of doubler diode  $D_1$ . (a) Working process with  $D_1$  in positive bias. (b)  
16 Working process with  $D_1$  in negative bias.

17 P-TENG can be equivalent to the series of a capacitor  $C_P$  and an AC voltage  
18 source  $V_V$  in the circuit, as displayed in Fig. S1. Suppose  $V_P$  and  $V_C$  are the voltage of  
19 P-TENG and  $C_P$ , the positive maximum value and negative maximum value of  $V_V$  are  
20  $V_{\max 1}$  and  $-V_{\max 2}$  respectively, where  $V_{\max 1} > 0$  and  $V_{\max 2} > 0$ . The voltage of  $V_2$  is

$$21 \quad V_2 = V_P = V_C + V_V \quad (S1)$$

22 If  $V_P \leq 0$ ,  $D_1$  is in positive bias and is equivalent to short circuit, as exhibited in  
23 Fig. S1a. In this situation,  $C_P$  is charging and current flows from  $V_V$  to  $C_P$  (red line in  
24 Fig. S1a). According to Kirchhoff's voltage law (KVL), it has

$$25 \quad V_C + V_V = 0 \quad (S2)$$

26 So the voltage of  $V_2$  is

$$27 \quad V_2 = V_C + V_V = 0 \quad (S3)$$

28 When  $V_V = -V_{\max 2}$ ,  $V_C$  reaches its maximum value,

29 
$$V_{C\_max} = V_{max2} \quad (S4)$$

30 If  $V_p > 0$ ,  $D_1$  is in negative bias and is equivalent to open circuit, as exhibited in  
31 Fig. S1b. So

32 
$$V_2 = V_{max2} + V_V \quad (S5)$$

33 When  $V_V = V_{max1}$ ,  $V_2$  reaches its maximum value,

34 
$$V_{2\_max} = V_{max1} + V_{max2} \quad (S6)$$

35 Specially, if  $V_{max1} = V_{max2} = V_{max}$ , the maximum value of  $V_2$  is

36 
$$V_{2\_max} = 2V_{max} \quad (S7)$$

37

38 **Note2: Calculation process of transferred charges.**

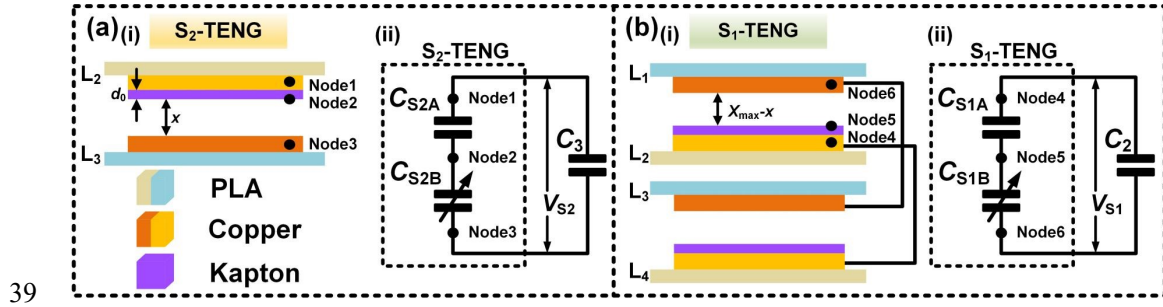

40 **Fig. S2.** Equivalent circuit diagram of S<sub>1</sub>-TENG and S<sub>2</sub>-TENG. (a) Equivalent circuit diagram of  
41 S<sub>2</sub>-TENG. (b) Equivalent circuit diagram of S<sub>1</sub>-TENG.

42 The equivalent circuit diagram of S<sub>2</sub>-TENG is exhibited in Fig. S2a. It  
43 equivalents to the series of a fixed capacitor C<sub>S2A</sub> and a variable capacitor C<sub>S2B</sub>,

44

$$C_{S2A} = \frac{\epsilon_0 \epsilon_r A}{d_0} \quad (S8)$$

45

$$C_{S2B}(x) = \frac{\epsilon_0 A}{x} \quad (S9)$$

46 where  $\epsilon_0$  and  $\epsilon_r$  denote vacuum permittivity and relative permittivity of dielectric  
47 material,  $d_0$  represents the thickness of dielectric material,  $A$  is the active area of S<sub>2</sub>-  
48 TENG,  $x$  stands for the distance from L<sub>2</sub> to L<sub>3</sub>, which satisfies  $0 \leq x \leq X_{\max}$ , and  $X_{\max}$  is  
49 the maximum value of  $x$ . So the equivalents capacitor of S<sub>2</sub>-TENG is

50

$$C_{S2}(x) = \frac{1}{\frac{1}{C_{S2A}} + \frac{1}{C_{S2B}(x)}} = \frac{\epsilon_0 \epsilon_r A}{\epsilon_r x + d_0} \quad (S10)$$

51 Let  $Q_2$  be the total charges of S<sub>2</sub>-TENG and buffer capacitor C<sub>3</sub>,

52

$$Q_2 = Q_{S2}(x) + Q_{C3}(x) \quad (S11)$$

53 where  $Q_{S2}$  and  $Q_{C3}$  are the charges in S<sub>2</sub>-TENG and C<sub>3</sub> respectively. It can be further  
54 expressed as

55

$$Q_2 = C_{S2}(x)V_{S2}(x) + C_3V_{C3}(x) \quad (S12)$$

56 where  $V_{S2}$  and  $V_{C3}$  represent the voltages of S<sub>2</sub>-TENG and C<sub>3</sub>. According to KVL, it  
57 has

58

$$V_{S2}(x) = V_{C3}(x) \quad (S13)$$

59 From equation (S10), (S12) and (S13), it has

60

$$V_{S2}(x) = \frac{\epsilon_r x + d_0}{\epsilon_r C_3 x + d_0 C_3 + \epsilon_0 \epsilon_r A} Q_2 \quad (S14)$$

61 So

62 
$$Q_{S_2}(x) = C_{S_2}(x)V_{S_2}(x) = \frac{\varepsilon_0\varepsilon_r A}{\varepsilon_r C_3 x + d_0 C_3 + \varepsilon_0\varepsilon_r A} Q_2 \quad (S15)$$

63 It shows that charges in S<sub>2</sub>-TENG varies with  $x$ , so the transferred charges of S<sub>2</sub>-  
64 TENG are from contacted state to separated state,

65 
$$Q_{TR2} = Q_{S_2}(0) - Q_{S_2}(X_{\max})$$

66 
$$= \frac{\varepsilon_0\varepsilon_r^2 AC_3 X_{\max}}{(d_0 C_3 + \varepsilon_0\varepsilon_r A)(\varepsilon_r C_3 X_{\max} + d_0 C_3 + \varepsilon_0\varepsilon_r A)} Q_2 \quad (S16)$$

67 Let  $\eta_2$  be the charge transfer efficiency of S<sub>2</sub>-TENG,

68 
$$\eta_2 = \frac{Q_{TR2}}{Q_2} \quad (S17)$$

69  $\eta_2$  reaches its maximum value when  $X_{\max} \rightarrow \infty$ ,

70 
$$\eta_{2\_max} = \frac{\varepsilon_0\varepsilon_r A}{d_0 C_3 + \varepsilon_0\varepsilon_r A} = \frac{1}{\frac{C_3}{C_{S2A}} + 1} < 1 \quad (S18)$$

71 It indicates  $\eta_2$  can not reach 100%, and is related to  $C_3$ . If  $C_3=0$  (short circuit), charge  
72 transfer efficiency is 100% which is the same as common TENG.

73 As to S<sub>1</sub>-TENG, the active area is twice of S<sub>2</sub>-TENG, and the distance is  $X_{\max}-x$ ,  
74 as depicted in Fig. S2b. The corresponding equations are listed below,

75 
$$V_{S_1}(x) = \frac{\varepsilon_r x - (\varepsilon_r X_{\max} + d_0)}{\varepsilon_r C_2 x - (\varepsilon_r C_2 X_{\max} + d_0 C_2 + 2\varepsilon_0\varepsilon_r A)} Q_1 \quad (S19)$$

76 
$$Q_{S_1}(x) = \frac{-2\varepsilon_0\varepsilon_r A}{\varepsilon_r C_2 x - (\varepsilon_r C_2 X_{\max} + d_0 C_2 + 2\varepsilon_0\varepsilon_r A)} Q_1 \quad (S20)$$

77 
$$Q_{TR1} = \frac{-2\varepsilon_0\varepsilon_r^2 AC_2 X_{\max}}{(d_0 C_2 + 2\varepsilon_0\varepsilon_r A)(\varepsilon_r C_2 X_{\max} + d_0 C_2 + 2\varepsilon_0\varepsilon_r A)} Q_1 \quad (S21)$$

78 where  $Q_1$  is the total charges of S<sub>1</sub>-TENG and buffer capacitor  $C_2$ .

79 The partial derivative results of  $V_{S_1}$  and  $V_{S_2}$  to  $x$  are

80 
$$\frac{\partial V_{S_1}}{\partial x} = \frac{-2\varepsilon_0\varepsilon_r^2 A Q_1}{[\varepsilon_r C_2 x - (\varepsilon_r C_2 X_{\max} + d_0 C_2 + 2\varepsilon_0\varepsilon_r A)]^2} < 0 \quad (S22)$$

81 
$$\frac{\partial V_{S_2}}{\partial x} = \frac{\varepsilon_0\varepsilon_r^2 A Q_2}{[\varepsilon_r C_3 x + (d_0 C_3 + \varepsilon_0\varepsilon_r A)]^2} > 0 \quad (S23)$$

82 It shows  $V_{S_1}$  and  $V_{S_2}$  have the opposite variation trends as  $x$  varies, so they are a pair  
83 of differential voltages. When one of them is increasing, the other one must be  
84 decreasing, and vice versa. It verifies again that S<sub>1</sub>-TENG and S<sub>2</sub>-TENG can take  
85 turns to accomplish the process of charge excitation and output.

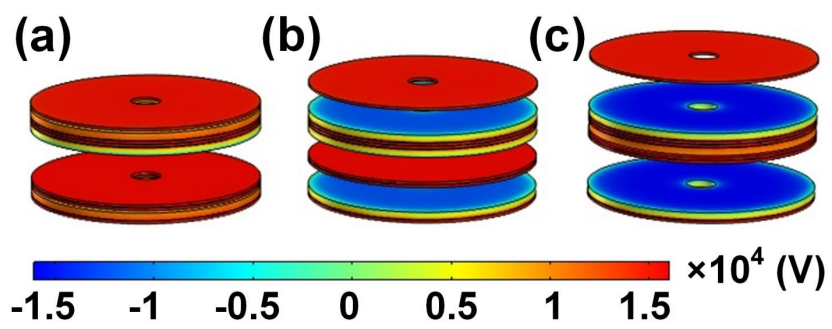

86

87 **Fig. S3.** The simulation of electrode potential.

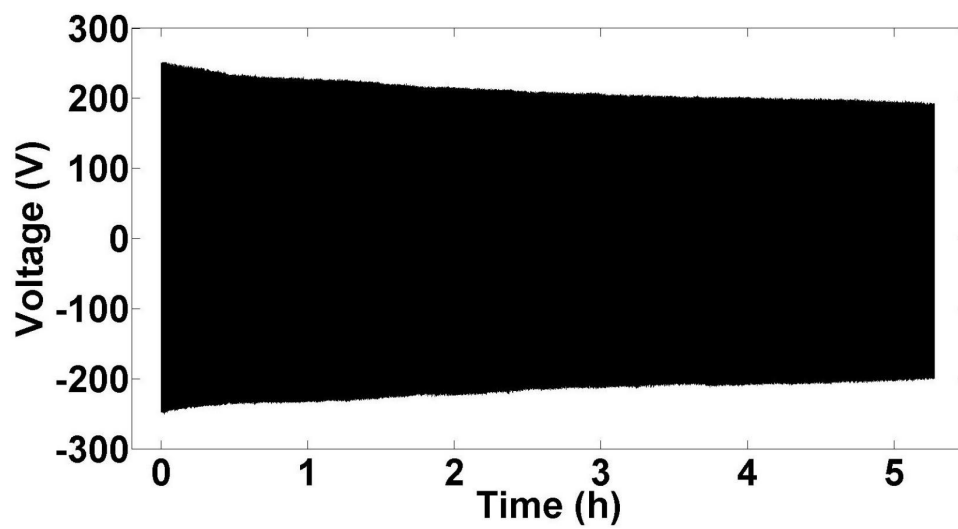

88

89 **Fig. S4.** The basic durability test of the device.

90 **Table S1.** Power density comparison with other charge excitation works.

| name                        | CST-greenhouse | MF-CE-TENG | O-TENG    | PS-TENG                                  |
|-----------------------------|----------------|------------|-----------|------------------------------------------|
| shape                       | arch           | rectangle  | rectangle | ring                                     |
| size(mm)                    | 200×157        | 198×138    | 50×50     | outer diameter: 92<br>inner diameter: 12 |
| area(m <sup>2</sup> )       | 3.14E-02       | 2.73E-02   | 2.50E-03  | 6.53E-03                                 |
| power                       | 107.09 μW      | 5.17 mW    | 697 μW    | 4 mW                                     |
| density(mW/m <sup>2</sup> ) | 3.06           | 189.2      | 278.8     | 612.4                                    |
| Ref.                        | [S1]           | [S2]       | [S3]      | This work                                |

91

92 **References**

- 93 [S1] H. Wang, M. Zhang, Z. Yang, Z. Wang, X. Liu, Y. Lu, L. Ji, Z. L. Wang, J. Cheng, Nano  
94 Energy, 2021, 89, 106328.
- 95 [S2] G. Li, G. Liu, W. He, L. Long, B. Li, Z. Wang, Q. Tang, W. Liu, C. Hu, Nano Research,  
96 2021, 14, 11.
- 97 [S3] S. Pongampai, P. Pakawanit, T. Charoonsuk, N. Vittayakorn, Nano Energy, 2021, 90, 106629.
