# Supplementary figures and images for: A primary–secondary triboelectric nanogenerator with charge excitation shift in a wind-driven alternating operating mode
Source: Royal Society of Chemistry journal article supplement (doi:10.1039/d3se00394a), 2023-01-01

(a) **D<sub>1</sub> in positive bias**

P-TENG

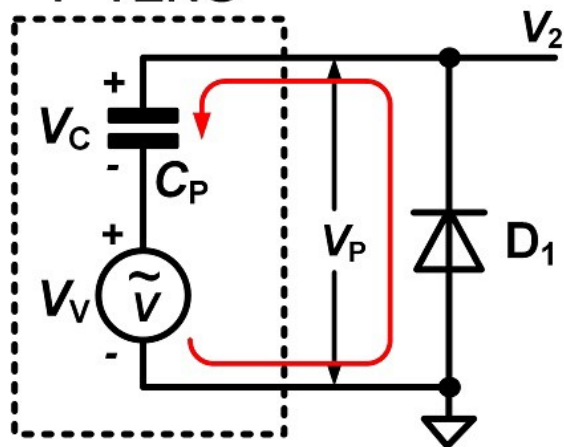

(b) **D<sub>1</sub> in negative bias**

P-TENG

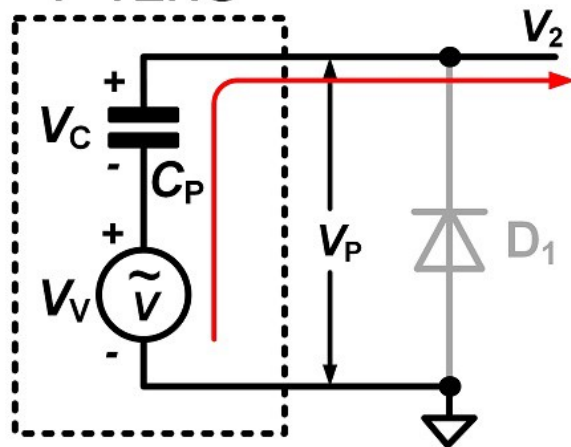

Supplement: d3se00394a1.pdf [file d3se00394a1.pdf]

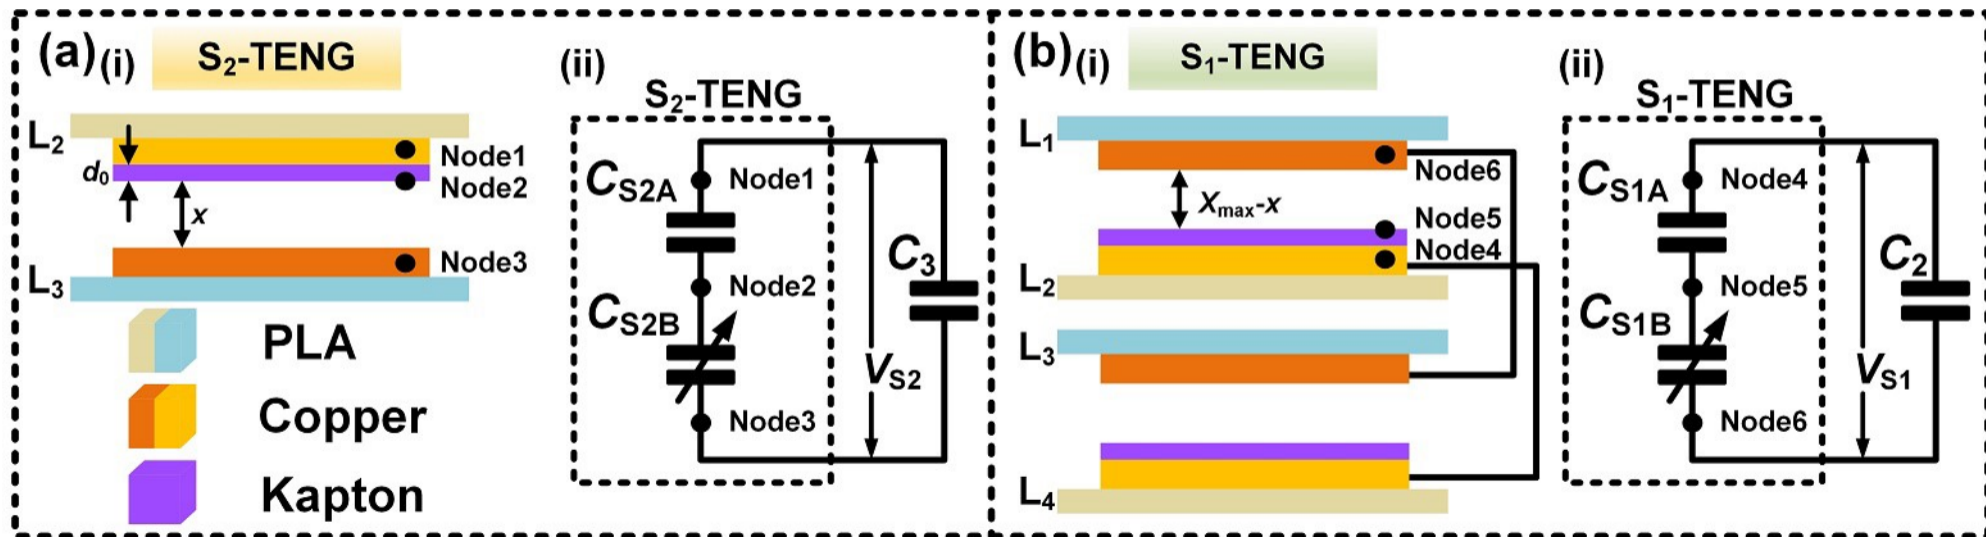

Supplement: d3se00394a2.pdf [file d3se00394a2.pdf]

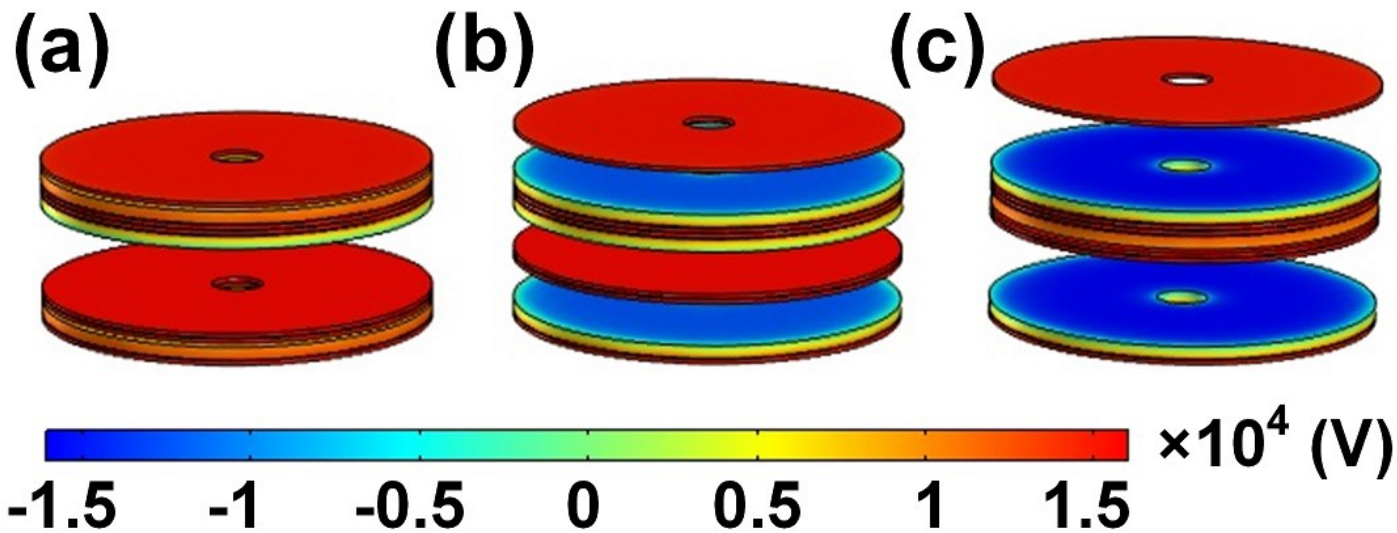

Supplement: d3se00394a3.pdf [file d3se00394a3.pdf]

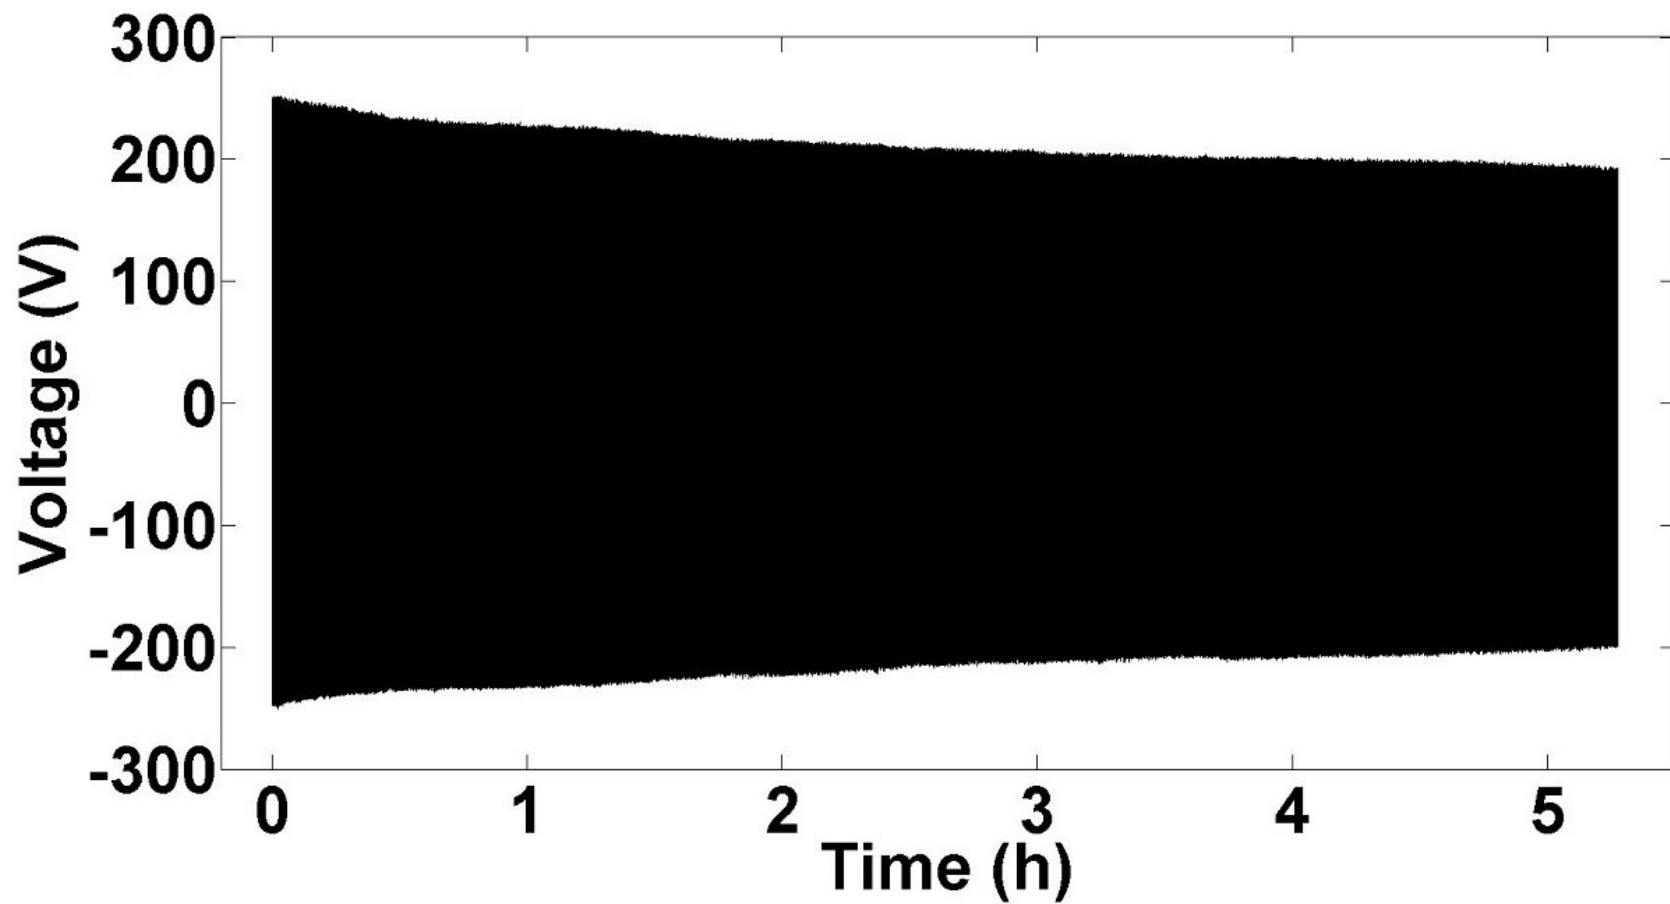

Supplement: d3se00394a4.pdf [file d3se00394a4.pdf]
